# Supplementary material for: Examining the possible causal relationship between lung function, COPD and Alzheimer’s disease: a Mendelian randomisation study
Source: PubMed Central journal article supplement (PMC8264898; doi:10.1136/bmjresp-2020-000759), 2021-07-07

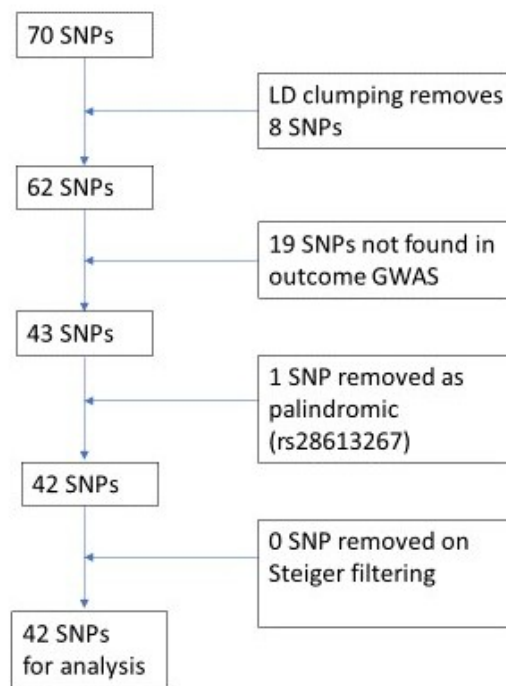

Supplement: bmjresp-2020-000759supp008.pdf [file bmjresp-2020-000759supp008.pdf]
