# Supplementary material for: Examining the possible causal relationship between lung function, COPD and Alzheimer’s disease: a Mendelian randomisation study
Source: BMJ Open Respir Res. 2021 Jul 7;8(1):e000759. doi: 10.1136/bmjresp-2020-000759 (PMC8264898; doi:10.1136/bmjresp-2020-000759)
Supplement: Supplementary data [file bmjresp-2020-000759supp012.xlsx]

## Sheet: all_traits
SNPs used: all lung function traits analysis
SNP	effect_allele	other_allele	eaf.exp	beta.exp	se.exp	pval.exp
rs10059661	C	G	0.8263	-0.0308	0.0032	1.783e-22
rs10059996	T	G	0.3548	-0.0352	0.0026	1.526e-42
rs1008833	A	G	0.8541	-0.0324	0.0036	1.495e-19
rs10141786	A	G	0.4017	0.0213	0.0024	9.526e-19
rs10836366	T	C	0.7486	0.0191	0.0027	2.331e-12
rs10850377	A	G	0.3408	0.0195	0.0025	4.018e-15
rs10874851	A	C	0.4776	-0.0139	0.0024	5.074e-09
rs10983184	T	C	0.6404	0.0273	0.0025	9.048e-28
rs1102077	A	C	0.7574	0.0215	0.0027	4.21e-15
rs1107677	T	C	0.4845	0.0219	0.0024	3.875e-20
rs11098196	T	G	0.5083	-0.0196	0.0024	2.423e-16
rs11134789	A	C	0.3412	-0.0408	0.0025	3.057e-59
rs11160037	A	G	0.6206	-0.0175	0.0024	4.691e-13
rs11172113	T	C	0.5889	-0.0227	0.0024	7.043e-21
rs11176001	A	C	0.1309	-0.0291	0.0035	4.876e-17
rs11191841	T	C	0.4914	-0.0168	0.0023	6.21e-13
rs11234768	T	C	0.8458	0.0303	0.0033	5.066e-20
rs11620380	A	C	0.1046	-0.027	0.0039	4.605e-12
rs11739847	A	G	0.1992	-0.021	0.0029	4.299e-13
rs1192415	A	G	0.8122	0.044	0.003	2.275e-47
rs12198986	A	G	0.478	-0.0227	0.0023	2.174e-22
rs12202314	T	C	0.6753	-0.0209	0.0025	2.167e-16
rs12331869	A	G	0.1789	-0.0181	0.0031	3.174e-09
rs12470864	A	G	0.3854	-0.0203	0.0024	1.042e-16
rs1249096	A	G	0.5634	0.0207	0.0024	3.935e-18
rs12497779	T	G	0.2334	-0.0319	0.0028	1.845e-30
rs12522114	A	C	0.265	-0.0367	0.0027	1.471e-41
rs12634907	A	G	0.6558	0.0262	0.0025	2.826e-26
rs12698403	A	G	0.4418	-0.0274	0.0024	6.419e-31
rs12707691	C	G	0.6642	-0.0205	0.0025	1.669e-16
rs12737805	A	G	0.7787	0.0203	0.0028	6.568e-13
rs1274475	A	G	0.3922	0.0168	0.0025	8.299e-12
rs1294417	T	C	0.4577	-0.0311	0.0024	3.928e-39
rs12997625	T	C	0.5284	-0.0169	0.0024	8.883e-13
rs13009582	A	G	0.4505	0.0158	0.0023	1.518e-11
rs13141641	T	C	0.601	-0.0704	0.0024	3.65e-184
rs13206405	A	C	0.2015	0.0344	0.003	4.67e-31
rs1338227	T	G	0.5774	0.0245	0.0024	3.923e-24
rs1406225	T	G	0.2836	-0.0197	0.0026	8.731e-14
rs141942982	T	G	0.1066	-0.0362	0.0039	9.573e-21
rs1491106	T	G	0.3764	0.0245	0.0025	2.805e-23
rs1513272	T	C	0.4996	0.0198	0.0023	1.105e-17
rs1529672	A	C	0.1736	0.0423	0.0031	1.727e-41
rs1570203	A	G	0.5296	0.0246	0.0024	5.783e-25
rs1610265	T	C	0.0769	-0.0379	0.0044	8.811e-18
rs1689510	C	G	0.3373	-0.0153	0.0025	5.571e-10
rs17163397	A	G	0.8764	-0.0307	0.0036	3.298e-17
rs17232687	T	C	0.4956	-0.0183	0.0024	6.813e-15
rs17531405	C	G	0.1804	0.028	0.0031	2.804e-19
rs17596617	T	C	0.3172	-0.0197	0.0025	3.575e-15
rs17666332	T	G	0.7235	0.0267	0.0027	9.224e-24
rs193686	T	C	0.6834	-0.0178	0.0026	4.065e-12
rs1951121	T	G	0.6011	0.0189	0.0024	7.547e-15
rs2027761	T	C	0.113	0.0369	0.0038	1.309e-22
rs2076295	T	G	0.5497	-0.0234	0.0024	6.952e-23
rs2084448	T	C	0.7063	0.0197	0.0026	4.648e-14
rs2261360	T	G	0.2322	0.0219	0.0028	8.744e-15
rs2304340	A	G	0.4084	-0.014	0.0024	3.718e-09
rs2355237	A	G	0.5124	0.029	0.0025	9.418e-31
rs2544536	T	C	0.4881	-0.0239	0.0024	4.146e-24
rs2571445	A	G	0.3971	-0.0285	0.0024	7.243e-33
rs2609279	T	C	0.2145	0.0537	0.0029	2.079e-76
rs2637254	A	G	0.5108	-0.0285	0.0023	3.909e-34
rs268717	T	C	0.9074	-0.034	0.004	3.225e-17
rs2798641	T	C	0.1829	-0.045	0.0031	3.886e-48
rs2812208	C	G	0.0212	0.0612	0.0081	4.946e-14
rs2816992	A	G	0.5879	-0.0164	0.0024	7.332e-12
rs28446321	A	T	0.0907	-0.0523	0.0042	4.723e-36
rs2894837	A	G	0.6398	0.0175	0.0024	9.223e-13
rs2974389	A	G	0.4265	0.0165	0.0023	1.703e-12
rs2999090	A	G	0.881	-0.0433	0.0037	6.759e-32
rs330939	T	G	0.6216	0.0232	0.0025	4.46e-21
rs34712979	A	G	0.2561	-0.0682	0.0028	4.18e-134
rs35043843	T	G	0.7562	-0.0238	0.0027	4.115e-18
rs35107139	A	C	0.5962	0.0315	0.0025	3.401e-36
rs35480566	A	G	0.56	-0.0221	0.0024	1.247e-20
rs35505	A	G	0.6861	0.0223	0.0025	1.916e-18
rs3791679	A	G	0.7714	0.0344	0.0028	7.187e-35
rs425102	T	G	0.7597	0.0209	0.0028	2.779e-14
rs4279944	T	C	0.1514	0.0218	0.0034	2.179e-10
rs4308141	C	G	0.8011	-0.0484	0.003	3.581e-59
rs4721442	T	G	0.8339	0.0215	0.0031	7.212e-12
rs4721457	T	C	0.8494	0.0244	0.0033	1.728e-13
rs4885681	T	C	0.7248	0.0186	0.0026	1.827e-12
rs4952564	A	G	0.681	-0.0172	0.0025	6.968e-12
rs541601	T	C	0.1829	-0.0241	0.0031	5.285e-15
rs55884799	T	C	0.8271	-0.0415	0.0031	4.015e-40
rs56196860	A	C	0.0312	-0.0531	0.0069	1.447e-14
rs56390486	A	G	0.2905	0.0196	0.0028	1.718e-12
rs60820984	T	C	0.1867	-0.0201	0.0032	6.376e-10
rs62168891	T	C	0.4032	0.0186	0.0024	1.076e-14
rs62201738	A	C	0.9218	-0.0743	0.0044	9.445e-63
rs62289340	T	C	0.4358	0.0167	0.0024	2.357e-12
rs62316310	A	G	0.2603	0.0272	0.0027	2.242e-23
rs62454414	T	G	0.8668	0.0208	0.0034	1.312e-09
rs6445932	T	G	0.7519	-0.0287	0.0027	3.816e-26
rs6780171	A	T	0.3129	-0.0174	0.0025	6.177e-12
rs6918725	T	G	0.4813	-0.0211	0.0024	4.726e-19
rs7024579	T	C	0.3154	-0.0233	0.0025	4.475e-20
rs7041139	T	C	0.3221	-0.0173	0.0025	3.085e-12
rs7082066	A	G	0.1848	0.0221	0.003	2.196e-13
rs7090277	A	T	0.5165	0.0409	0.0024	3.965e-67
rs71490394	A	G	0.3671	0.0264	0.0024	1.659e-27
rs72673461	T	G	0.9507	0.0508	0.0055	3.115e-20
rs72902177	T	C	0.1346	-0.0335	0.0034	1.759e-22
rs73048404	T	G	0.8529	0.0209	0.0033	2.096e-10
rs74053129	A	G	0.0959	0.0392	0.004	2.153e-22
rs7424771	A	G	0.4468	-0.0169	0.0024	6.567e-13
rs7465401	T	C	0.7263	-0.0211	0.0026	9.086e-16
rs755249	T	C	0.2328	-0.0239	0.0028	9.818e-18
rs7733410	A	G	0.4407	0.0505	0.0024	1.56e-96
rs7752448	A	G	0.8746	0.0553	0.0038	1.213e-48
rs7753012	T	G	0.6949	-0.0712	0.0026	4.71e-165
rs78101726	A	G	0.8459	0.0334	0.0032	7.724e-25
rs7838717	T	C	0.3631	-0.0234	0.0025	6.47e-21
rs7970544	T	G	0.1869	0.0439	0.0031	1.449e-46
rs7977418	T	C	0.5415	0.0379	0.0023	9.572e-59
rs79898473	T	C	0.671	-0.0308	0.0026	2.308e-33
rs803765	A	C	0.3452	-0.0245	0.0025	1.74e-23
rs878471	A	G	0.5797	-0.0278	0.0024	1.496e-31
rs879394	T	G	0.2348	-0.0289	0.0028	1.357e-25
rs9435733	T	C	0.4817	0.0389	0.0024	5.945e-61
rs9438626	C	G	0.21	0.0175	0.0028	8.062e-10
rs9472541	A	T	0.2853	-0.0154	0.0026	2.471e-09
rs9533803	T	C	0.2134	-0.0261	0.0029	2.916e-19
rs9634470	T	C	0.7347	-0.0208	0.0027	2.725e-14
rs9661687	T	C	0.8633	-0.0271	0.0035	6.114e-15
rs9661802	A	C	0.6649	0.0247	0.0025	5.562e-23
rs972936	T	C	0.2625	0.0286	0.0029	1.846e-23
rs987068	C	G	0.6889	-0.0296	0.0026	1.461e-30
rs9970286	A	G	0.3291	0.0236	0.0025	1.92e-20

## Sheet: FEV1
SNPs used: FEV1 analysis
SNP	effect_allele	other_allele	eaf.exp	beta.exp	se.exp	pval.exp
rs10838435	C	G	0.1439	0.0211	0.0033	1.456e-10
rs10850377	A	G	0.3408	0.0195	0.0025	4.018e-15
rs1102077	A	C	0.7574	0.0215	0.0027	4.21e-15
rs11160037	A	G	0.6206	-0.0175	0.0024	4.691e-13
rs11176001	A	C	0.1309	-0.0291	0.0035	4.876e-17
rs11191841	T	C	0.4914	-0.0168	0.0023	6.21e-13
rs11722225	T	C	0.9335	-0.0729	0.0047	2.432e-54
rs11739847	A	G	0.1992	-0.021	0.0029	4.299e-13
rs11952673	T	G	0.3989	-0.0186	0.0024	1.351e-14
rs12096239	C	G	0.253	-0.0187	0.0027	2.084e-12
rs12331869	A	G	0.1789	-0.0181	0.0031	3.174e-09
rs12698403	A	G	0.4418	-0.0274	0.0024	6.419e-31
rs12707691	C	G	0.6642	-0.0205	0.0025	1.669e-16
rs12737805	A	G	0.7787	0.0203	0.0028	6.568e-13
rs12811814	T	C	0.4576	0.0149	0.0024	2.573e-10
rs12825748	C	G	0.3087	0.0198	0.0025	6.269e-15
rs1513272	T	C	0.4996	0.0198	0.0023	1.105e-17
rs1800888	T	C	0.0147	-0.0844	0.0098	6.447e-18
rs2304340	A	G	0.4084	-0.014	0.0024	3.718e-09
rs2571445	A	G	0.3971	-0.0285	0.0024	7.243e-33
rs2637254	A	G	0.5108	-0.0285	0.0023	3.909e-34
rs2701110	A	C	0.1664	0.0259	0.0032	1.908e-16
rs2812208	C	G	0.0212	0.0612	0.0081	4.946e-14
rs28613267	C	G	0.5112	0.0168	0.0023	9.19e-13
rs2894837	A	G	0.6398	0.0175	0.0024	9.223e-13
rs2974389	A	G	0.4265	0.0165	0.0023	1.703e-12
rs4128298	T	C	0.7176	-0.0172	0.0026	3.477e-11
rs4651005	T	C	0.3214	0.0185	0.0025	1.377e-13
rs4866846	A	G	0.1499	0.0277	0.0033	2.465e-17
rs4885681	T	C	0.7248	0.0186	0.0026	1.827e-12
rs6445932	T	G	0.7519	-0.0287	0.0027	3.816e-26
rs6710301	A	C	0.1492	0.0235	0.0033	8.505e-13
rs6780171	A	T	0.3129	-0.0174	0.0025	6.177e-12
rs7041139	T	C	0.3221	-0.0173	0.0025	3.085e-12
rs7082066	A	G	0.1848	0.0221	0.003	2.196e-13
rs71490394	A	G	0.3671	0.0264	0.0024	1.659e-27
rs72902177	T	C	0.1346	-0.0335	0.0034	1.759e-22
rs7424771	A	G	0.4468	-0.0169	0.0024	6.567e-13
rs7465401	T	C	0.7263	-0.0211	0.0026	9.086e-16
rs78101726	A	G	0.8459	0.0334	0.0032	7.724e-25
rs879394	T	G	0.2348	-0.0289	0.0028	1.357e-25
rs9385988	A	G	0.7232	-0.0279	0.0026	1.398e-26
rs967497	A	G	0.3102	0.015	0.0025	2.794e-09

## Sheet: FVC
SNPs used: FVC analysis
SNP	effect_allele	other_allele	eaf.exp	beta.exp	se.exp	pval.exp
rs10141786	A	G	0.4017	0.0213	0.0024	9.53e-19
rs10498672	C	G	0.8227	0.0352	0.003	7.5e-31
rs10998018	A	G	0.4965	-0.0224	0.0024	2.43e-21
rs11165787	A	G	0.7562	0.0245	0.0026	1.63e-21
rs12198986	A	G	0.478	-0.0227	0.0023	2.17e-22
rs1249096	A	G	0.5634	0.0207	0.0024	3.94e-18
rs12497779	T	G	0.2334	-0.0319	0.0028	1.85e-30
rs12634907	A	G	0.6558	0.0262	0.0025	2.83e-26
rs12997625	T	C	0.5284	-0.0169	0.0024	8.88e-13
rs13009582	A	G	0.4505	0.0158	0.0023	1.52e-11
rs13109426	A	G	0.5918	-0.0226	0.0024	4.2e-21
rs13430465	T	C	0.0803	0.0368	0.0043	1.87e-17
rs1610265	T	C	0.0769	-0.0379	0.0044	8.81e-18
rs17009288	A	C	0.7061	-0.0251	0.0026	3.68e-22
rs17232687	T	C	0.4956	-0.0183	0.0024	6.81e-15
rs17596617	T	C	0.3172	-0.0197	0.0025	3.58e-15
rs2146098	A	G	0.6452	-0.018	0.0024	2.03e-13
rs268717	T	C	0.9074	-0.034	0.004	3.23e-17
rs2816992	A	G	0.5879	-0.0164	0.0024	7.33e-12
rs35043843	T	G	0.7562	-0.0238	0.0027	4.12e-18
rs35480566	A	G	0.56	-0.0221	0.0024	1.25e-20
rs35505	A	G	0.6861	0.0223	0.0025	1.92e-18
rs3791679	A	G	0.7714	0.0344	0.0028	7.19e-35
rs425102	T	G	0.7597	0.0209	0.0028	2.78e-14
rs4674407	T	C	0.4969	-0.015	0.0024	2.84e-10
rs4721442	T	G	0.8339	0.0215	0.0031	7.21e-12
rs4952564	A	G	0.681	-0.0172	0.0025	6.97e-12
rs56196860	A	C	0.0312	-0.0531	0.0069	1.45e-14
rs62168891	T	C	0.4032	0.0186	0.0024	1.08e-14
rs62454414	T	G	0.8668	0.0208	0.0034	1.31e-09
rs6431620	T	G	0.7887	0.0185	0.0029	1.4e-10
rs6733504	A	G	0.5464	0.0191	0.0024	7.39e-16
rs6859730	A	T	0.3275	0.0206	0.0025	8.76e-17
rs6918725	T	G	0.4813	-0.0211	0.0024	4.73e-19
rs7024579	T	C	0.3154	-0.0233	0.0025	4.48e-20
rs73048404	T	G	0.8529	0.0209	0.0033	2.1e-10
rs771662	T	C	0.3493	-0.0158	0.0025	1.08e-10
rs7838717	T	C	0.3631	-0.0234	0.0025	6.47e-21
rs7977418	T	C	0.5415	0.0379	0.0023	9.57e-59
rs803765	A	C	0.3452	-0.0245	0.0025	1.74e-23
rs878471	A	G	0.5797	-0.0278	0.0024	1.5e-31
rs9357446	A	G	0.5169	-0.0151	0.0023	1.04e-10
rs9438626	C	G	0.21	0.0175	0.0028	8.06e-10
rs9472541	A	T	0.2853	-0.0154	0.0026	2.47e-09
rs9689096	A	C	0.9374	-0.036	0.0049	1.99e-13
rs9788269	A	G	0.7324	-0.0135	0.0027	3.97e-07

## Sheet: Ratio
SNPs used: FEV1/FVC analysis
SNP	effect_allele	other_allele	eaf.exp	beta.exp	se.exp	pval.exp
rs10059661	C	G	0.8263	-0.0308	0.0032	1.783e-22
rs10059996	T	G	0.3548	-0.0352	0.0026	1.526e-42
rs10836366	T	C	0.7486	0.0191	0.0027	2.331e-12
rs10841302	C	G	0.5464	0.0167	0.0024	2.294e-12
rs10874851	A	C	0.4776	-0.0139	0.0024	5.074e-09
rs10919604	A	G	0.6028	0.0198	0.0024	4.481e-16
rs10983184	T	C	0.6404	0.0273	0.0025	9.048e-28
rs1107677	T	C	0.4845	0.0219	0.0024	3.875e-20
rs11098196	T	G	0.5083	-0.0196	0.0024	2.423e-16
rs11134789	A	C	0.3412	-0.0408	0.0025	3.057e-59
rs11172113	T	C	0.5889	-0.0227	0.0024	7.043e-21
rs11234768	T	C	0.8458	0.0303	0.0033	5.066e-20
rs113745635	T	C	0.2163	-0.0275	0.0029	2.355e-21
rs11620380	A	C	0.1046	-0.027	0.0039	4.605e-12
rs1192415	A	G	0.8122	0.044	0.003	2.275e-47
rs12202314	T	C	0.6753	-0.0209	0.0025	2.167e-16
rs12470864	A	G	0.3854	-0.0203	0.0024	1.042e-16
rs12522114	A	C	0.265	-0.0367	0.0027	1.471e-41
rs12715478	A	G	0.5941	0.025	0.0024	1.349e-24
rs1274475	A	G	0.3922	0.0168	0.0025	8.299e-12
rs1294417	T	C	0.4577	-0.0311	0.0024	3.928e-39
rs13141641	T	C	0.601	-0.0704	0.0024	3.65e-184
rs13198081	C	G	0.3532	0.0297	0.0025	3.068e-33
rs13206405	A	C	0.2015	0.0344	0.003	4.67e-31
rs1338227	T	G	0.5774	0.0245	0.0024	3.923e-24
rs1406225	T	G	0.2836	-0.0197	0.0026	8.731e-14
rs141942982	T	G	0.1066	-0.0362	0.0039	9.573e-21
rs1491106	T	G	0.3764	0.0245	0.0025	2.805e-23
rs1529672	A	C	0.1736	0.0423	0.0031	1.727e-41
rs1570203	A	G	0.5296	0.0246	0.0024	5.783e-25
rs17163397	A	G	0.8764	-0.0307	0.0036	3.298e-17
rs17531405	C	G	0.1804	0.028	0.0031	2.804e-19
rs1756281	A	G	0.6987	0.0237	0.0026	1.381e-19
rs17666332	T	G	0.7235	0.0267	0.0027	9.224e-24
rs193686	T	C	0.6834	-0.0178	0.0026	4.065e-12
rs1951121	T	G	0.6011	0.0189	0.0024	7.547e-15
rs2027761	T	C	0.113	0.0369	0.0038	1.309e-22
rs2070600	T	G	0.3212	0.1452	0.0049	3e-189
rs2076295	T	G	0.5497	-0.0234	0.0024	6.952e-23
rs2084448	T	C	0.7063	0.0197	0.0026	4.648e-14
rs2261360	T	G	0.2322	0.0219	0.0028	8.744e-15
rs2544536	T	C	0.4881	-0.0239	0.0024	4.146e-24
rs2609279	T	C	0.2145	0.0537	0.0029	2.079e-76
rs2798641	T	C	0.1829	-0.045	0.0031	3.886e-48
rs28446321	A	T	0.0907	-0.0523	0.0042	4.723e-36
rs2999090	A	G	0.881	-0.0433	0.0037	6.759e-32
rs330939	T	G	0.6216	0.0232	0.0025	4.46e-21
rs34712979	A	G	0.2561	-0.0682	0.0028	4.18e-134
rs35107139	A	C	0.5962	0.0315	0.0025	3.401e-36
rs4279944	T	C	0.1514	0.0218	0.0034	2.179e-10
rs4308141	C	G	0.8011	-0.0484	0.003	3.581e-59
rs4721457	T	C	0.8494	0.0244	0.0033	1.728e-13
rs541601	T	C	0.1829	-0.0241	0.0031	5.285e-15
rs55884799	T	C	0.8271	-0.0415	0.0031	4.015e-40
rs586936	A	G	0.4022	-0.018	0.0025	2.114e-13
rs62201738	A	C	0.9218	-0.0743	0.0044	9.445e-63
rs62289340	T	C	0.4358	0.0167	0.0024	2.357e-12
rs62316310	A	G	0.2603	0.0272	0.0027	2.242e-23
rs6435952	A	T	0.1505	0.0258	0.0033	1.064e-14
rs7090277	A	T	0.5165	0.0409	0.0024	3.965e-67
rs721917	A	G	0.5811	0.0193	0.0024	1.645e-15
rs72673461	T	G	0.9507	0.0508	0.0055	3.115e-20
rs74053129	A	G	0.0959	0.0392	0.004	2.153e-22
rs755249	T	C	0.2328	-0.0239	0.0028	9.818e-18
rs7733410	A	G	0.4407	0.0505	0.0024	1.56e-96
rs7753012	T	G	0.6949	-0.0712	0.0026	4.71e-165
rs7970544	T	G	0.1869	0.0439	0.0031	1.449e-46
rs79898473	T	C	0.671	-0.0308	0.0026	2.308e-33
rs9435733	T	C	0.4817	0.0389	0.0024	5.945e-61
rs9533803	T	C	0.2134	-0.0261	0.0029	2.916e-19
rs9634470	T	C	0.7347	-0.0208	0.0027	2.725e-14
rs9661687	T	C	0.8633	-0.0271	0.0035	6.114e-15
rs9661802	A	C	0.6649	0.0247	0.0025	5.562e-23
rs985256	A	C	0.2185	0.0179	0.0029	5.86e-10
rs987068	C	G	0.6889	-0.0296	0.0026	1.461e-30
rs9970286	A	G	0.3291	0.0236	0.0025	1.92e-20

## Sheet: COPD
SNPs used: COPD Analysis
SNP	effect_allele	other_allele	eaf.exp	beta.exp	se.exp	pval.exp
rs10037493	T	C	0.4509	-0.1189	0.009	2.58e-33
rs10114763	A	T	0.5794	-0.0711	0.0099	8.66e-13
rs10760580	A	G	0.2916	-0.0717	0.0111	1.18e-10
rs10866659	A	G	0.6535	-0.0849	0.0102	1.17e-16
rs11049386	A	T	0.289	-0.0618	0.011	2.7e-08
rs11118406	A	T	0.7238	-0.0725	0.011	4.11e-11
rs11579382	C	G	0.4199	0.0582	0.01	6.5e-09
rs117261012	A	G	0.842	-0.0837	0.0136	6.91e-10
rs12466981	T	C	0.2721	-0.061	0.0112	4.85e-08
rs12519165	A	T	0.3845	0.0653	0.0107	1.06e-09
rs13073544	C	G	0.275	0.062	0.011	2.04e-08
rs13140176	A	G	0.612	0.1662	0.0103	4.09e-59
rs1334576	A	G	0.4188	0.0555	0.0097	1.19e-08
rs1529672	A	C	0.1741	-0.0867	0.013	2.54e-11
rs153916	T	C	0.5467	0.0602	0.0097	6.32e-10
rs1551943	A	G	0.2256	0.0725	0.0117	5.83e-10
rs1570221	A	G	0.3546	0.0575	0.0103	2.22e-08
rs16825267	C	G	0.1762	0.1762	0.019	1.75e-20
rs17759204	A	G	0.7253	-0.0713	0.011	8.81e-11
rs2040732	T	C	0.4156	-0.0581	0.01	6.89e-09
rs2284174	T	C	0.7774	-0.1174	0.0124	2.1e-21
rs2442776	A	G	0.8544	-0.0879	0.0138	1.99e-10
rs2571445	A	G	0.39	0.0701	0.0101	3.43e-12
rs2579762	A	C	0.533	-0.0625	0.0099	2.58e-10
rs2806356	T	C	0.8155	-0.0977	0.0124	2.89e-15
rs2897075	T	C	0.3662	-0.0636	0.0103	7.26e-10
rs2955083	A	T	0.8807	0.1224	0.0155	3.53e-15
rs34651	T	C	0.9194	-0.1013	0.0183	3.02e-08
rs34712979	A	G	0.2525	0.1691	0.0118	3.04e-46
rs4093840	A	T	0.4681	0.0621	0.0099	3.91e-10
rs4585380	A	G	0.2619	-0.0665	0.0113	3.4e-09
rs4660861	T	G	0.4298	-0.0549	0.01	4.42e-08
rs4757118	T	C	0.5356	0.059	0.01	3.79e-09
rs62191105	T	C	0.1984	-0.089	0.0127	2.58e-12
rs629619	T	C	0.1974	0.078	0.0124	2.94e-10
rs646695	T	C	0.7563	-0.0747	0.0114	4.62e-11
rs674621	T	C	0.6815	-0.0603	0.0104	7.61e-09
rs7068966	T	C	0.51	-0.0959	0.0097	6.22e-23
rs72673419	T	C	0.051	0.1299	0.0221	4e-09
rs72902175	T	C	0.1313	0.0824	0.0146	1.63e-08
rs7307510	T	C	0.1925	-0.0736	0.0124	2.64e-09
rs7642001	A	G	0.3687	0.078	0.01	1.08e-14
rs7650602	T	C	0.5506	-0.0546	0.01	4.86e-08
rs7671261	A	G	0.5462	0.0855	0.0097	1.43e-18
rs76841360	A	G	0.226	0.0728	0.0117	4.95e-10
rs7866939	T	C	0.6698	-0.0593	0.0105	1.75e-08
rs7958945	A	G	0.6408	-0.0627	0.0103	1.03e-09
rs798565	A	G	0.2936	-0.0654	0.0111	3.93e-09
rs803923	A	G	0.532	0.0248	0.0098	2.72e-08
rs9329170	T	C	0.8594	0.0924	0.0147	3.56e-10
rs9350191	T	C	0.8482	0.113	0.0148	5.11e-14
rs9399401	T	C	0.7204	0.147	0.011	1.64e-40
rs9435731	A	C	0.5112	0.0613	0.0099	6.55e-10
rs9525927	A	G	0.8075	-0.0735	0.0124	2.78e-09
rs955277	T	C	0.6079	0.0652	0.0102	1.9e-10
rs979453	A	G	0.6644	-0.0598	0.0105	1.4e-08
